# Supplementary material
Source: PubMed Central journal article supplement (PMC5145261)

## Cumulative Incidence for Cohort 3

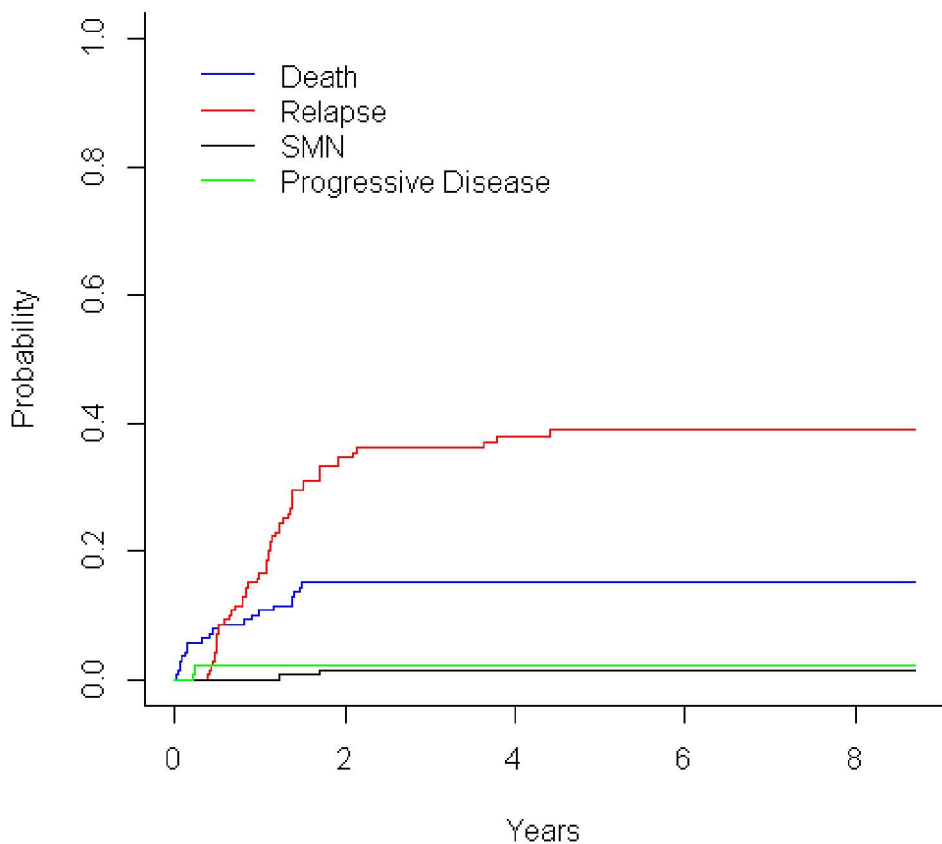

5-year cumulative incidence rates:

Death: 15.1%  $\pm$  3.0%

Relapse: 39.0%  $\pm$  4.3%

SMN: 1.45%  $\pm$  1.0%

Progressive Disease: 2.13%  $\pm$  1.2%

# SUPPLEMENTAL FIGURE 2

## EFS Curves for Cohort 3: MLL-G vs MLL-R

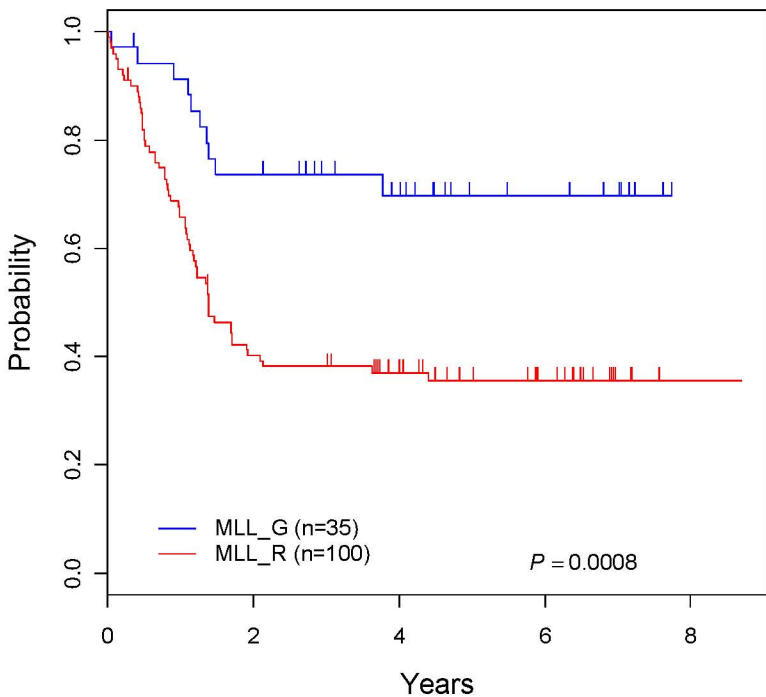

EFS Curves for Cohort 3: WBC<50K vs WBC>=50K

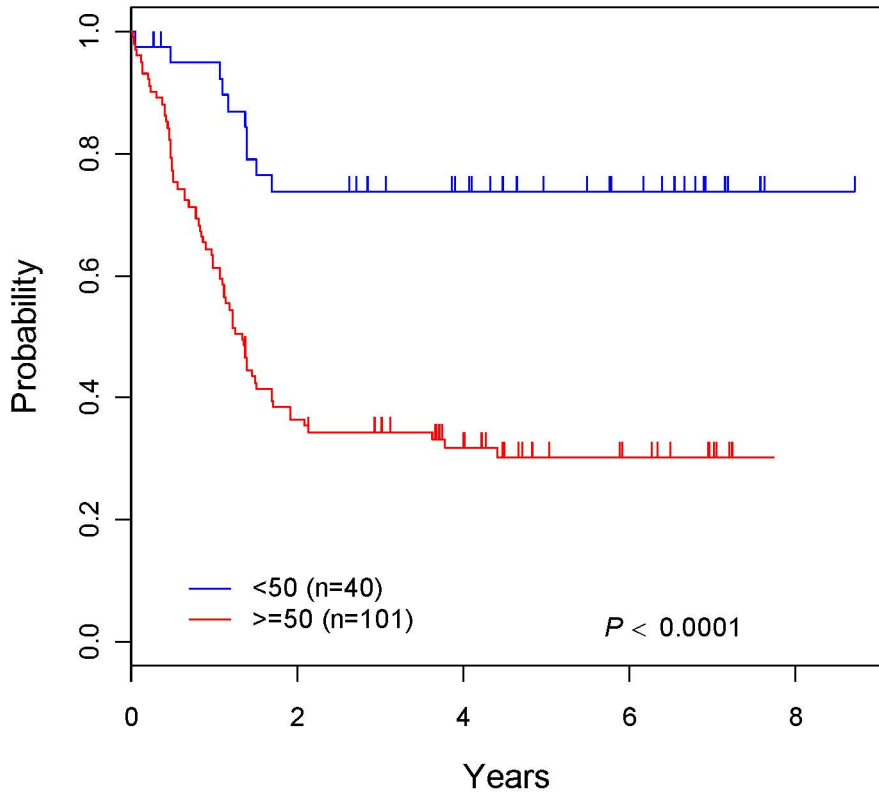

EFS Curves for Cohort 3: WBC by Age at Diagnosis

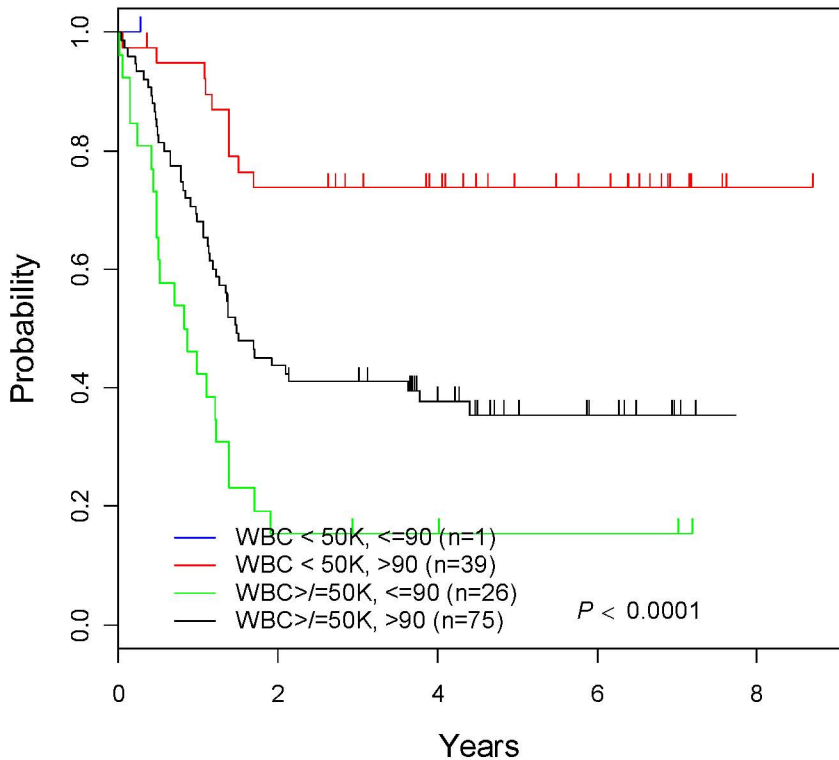

EFS Curves for Cohort 3: CNS Status

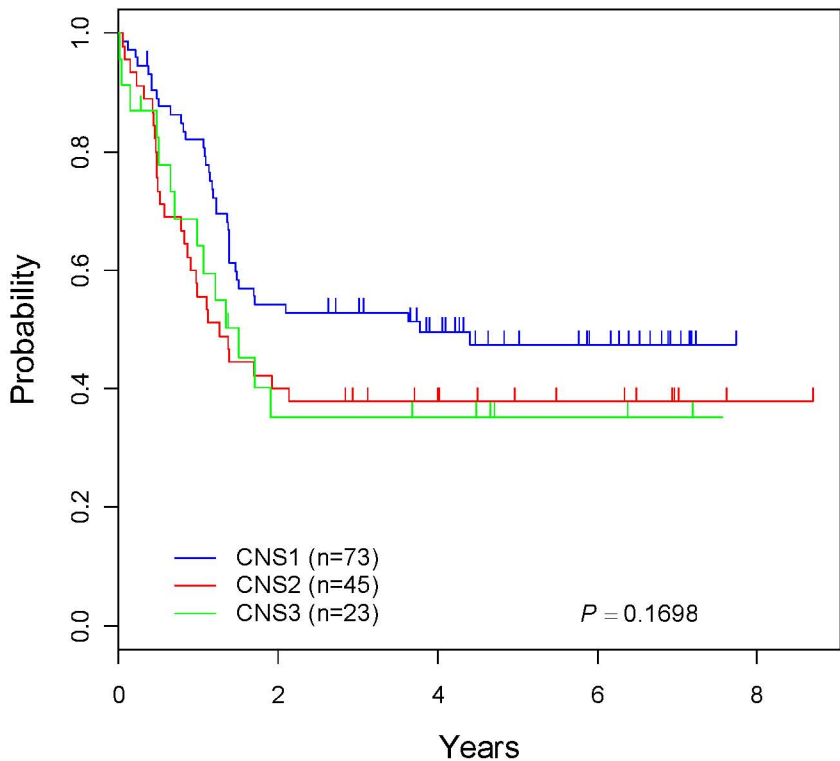

Supplement: NIHMS632538-supplement-Supp_FigureS1-S5.pdf [file NIHMS632538-supplement-Supp_FigureS1-S5.pdf]
